# Supplementary material for: Occurrence and seasonal variation of human Plasmodium infection in Punjab Province, Pakistan
Source: PubMed Central journal article supplement (PMC6836532; doi:10.1186/s12879-019-4590-2), 2019-11-06
Supplement: 12879_2019_4590_MOESM2_ESM.pdf [file 12879_2019_4590_MOESM2_ESM.pdf]

# Performa of sample collection

Date: \_\_\_\_\_ Month: \_\_\_\_\_ Year : \_\_\_\_\_

|                                                       | Subject 1 | Subject 2 | Subject 3 | Subject 4 |
|-------------------------------------------------------|-----------|-----------|-----------|-----------|
| <b>Personal</b>                                       |           |           |           |           |
| Field visit (s)                                       |           |           |           |           |
| Performa No.                                          |           |           |           |           |
| Sample I.D                                            |           |           |           |           |
| Slide collection                                      |           |           |           |           |
| Origin of subject                                     |           |           |           |           |
| Gender                                                |           |           |           |           |
| Age                                                   |           |           |           |           |
| Language                                              |           |           |           |           |
| Education                                             |           |           |           |           |
| Occupation                                            |           |           |           |           |
| Contact                                               |           |           |           |           |
| <b>Symptoms</b>                                       |           |           |           |           |
| Shivering                                             |           |           |           |           |
| Temperature                                           |           |           |           |           |
| Coma                                                  |           |           |           |           |
| Convulsion                                            |           |           |           |           |
| <b>Specie Identification<br/>(Through Microscopy)</b> |           |           |           |           |
| <i>P. viavx</i>                                       |           |           |           |           |
| <i>P. falciparum</i>                                  |           |           |           |           |
| <i>P. malariae</i>                                    |           |           |           |           |
| <i>P. ovale</i>                                       |           |           |           |           |
| Mixed infection                                       |           |           |           |           |
