# Supplementary material for: Occurrence and seasonal variation of human Plasmodium infection in Punjab Province, Pakistan
Source: PubMed Central journal article supplement (PMC6836532; doi:10.1186/s12879-019-4590-2), 2019-11-06
Supplement: 12879_2019_4590_MOESM3_ESM.pdf [file 12879_2019_4590_MOESM3_ESM.pdf]

# Appendix A

## Parental Approval Form

(Parent or Guardian Must Complete)

I hereby give my consent to have my son/daughter \_\_\_\_\_  
participate in a study about malaria control. I also authorize the physician or  
technician to share blood sample of my children to Ms. Huma Fatima from  
Parasitology Lab of Quaid-e-Azam university for research purpose only.

\_\_\_\_\_  
**Signature of parent**

\_\_\_\_\_  
**Date**

\_\_\_\_\_  
**Relationship to Child**

\_\_\_\_\_  
**Telephone**

**Address** \_\_\_\_\_

**City** \_\_\_\_\_ **State** \_\_\_\_\_ **Zip code** \_\_\_\_\_

**Mom/Dad/Guardian's work phone** \_\_\_\_\_

**Son/Daughter's birth date** \_\_\_\_\_

**Name of child's physician** \_\_\_\_\_

**Medical History (if any)**

\_\_\_\_\_  
\_\_\_\_\_  
\_\_\_\_\_
